# Supplementary material for: Legacy of historical disturbance shapes modern genetic diversity in a high-elevation salamander
Source: Research Square preprint supplement (doi:10.21203/rs.3.rs-7623606/v1), 2025-10-12
Supplement: Supplementary file 1 [file 0ece7dd64861ca9682d6386a.docx]

Supplemental Figures

Fig. S1. Performance of each buffer distance of historical disturbance in predicting modern genetic diversity based on leave one out cross validation (LOO) and expected log pointwise predictive density (ELPD)


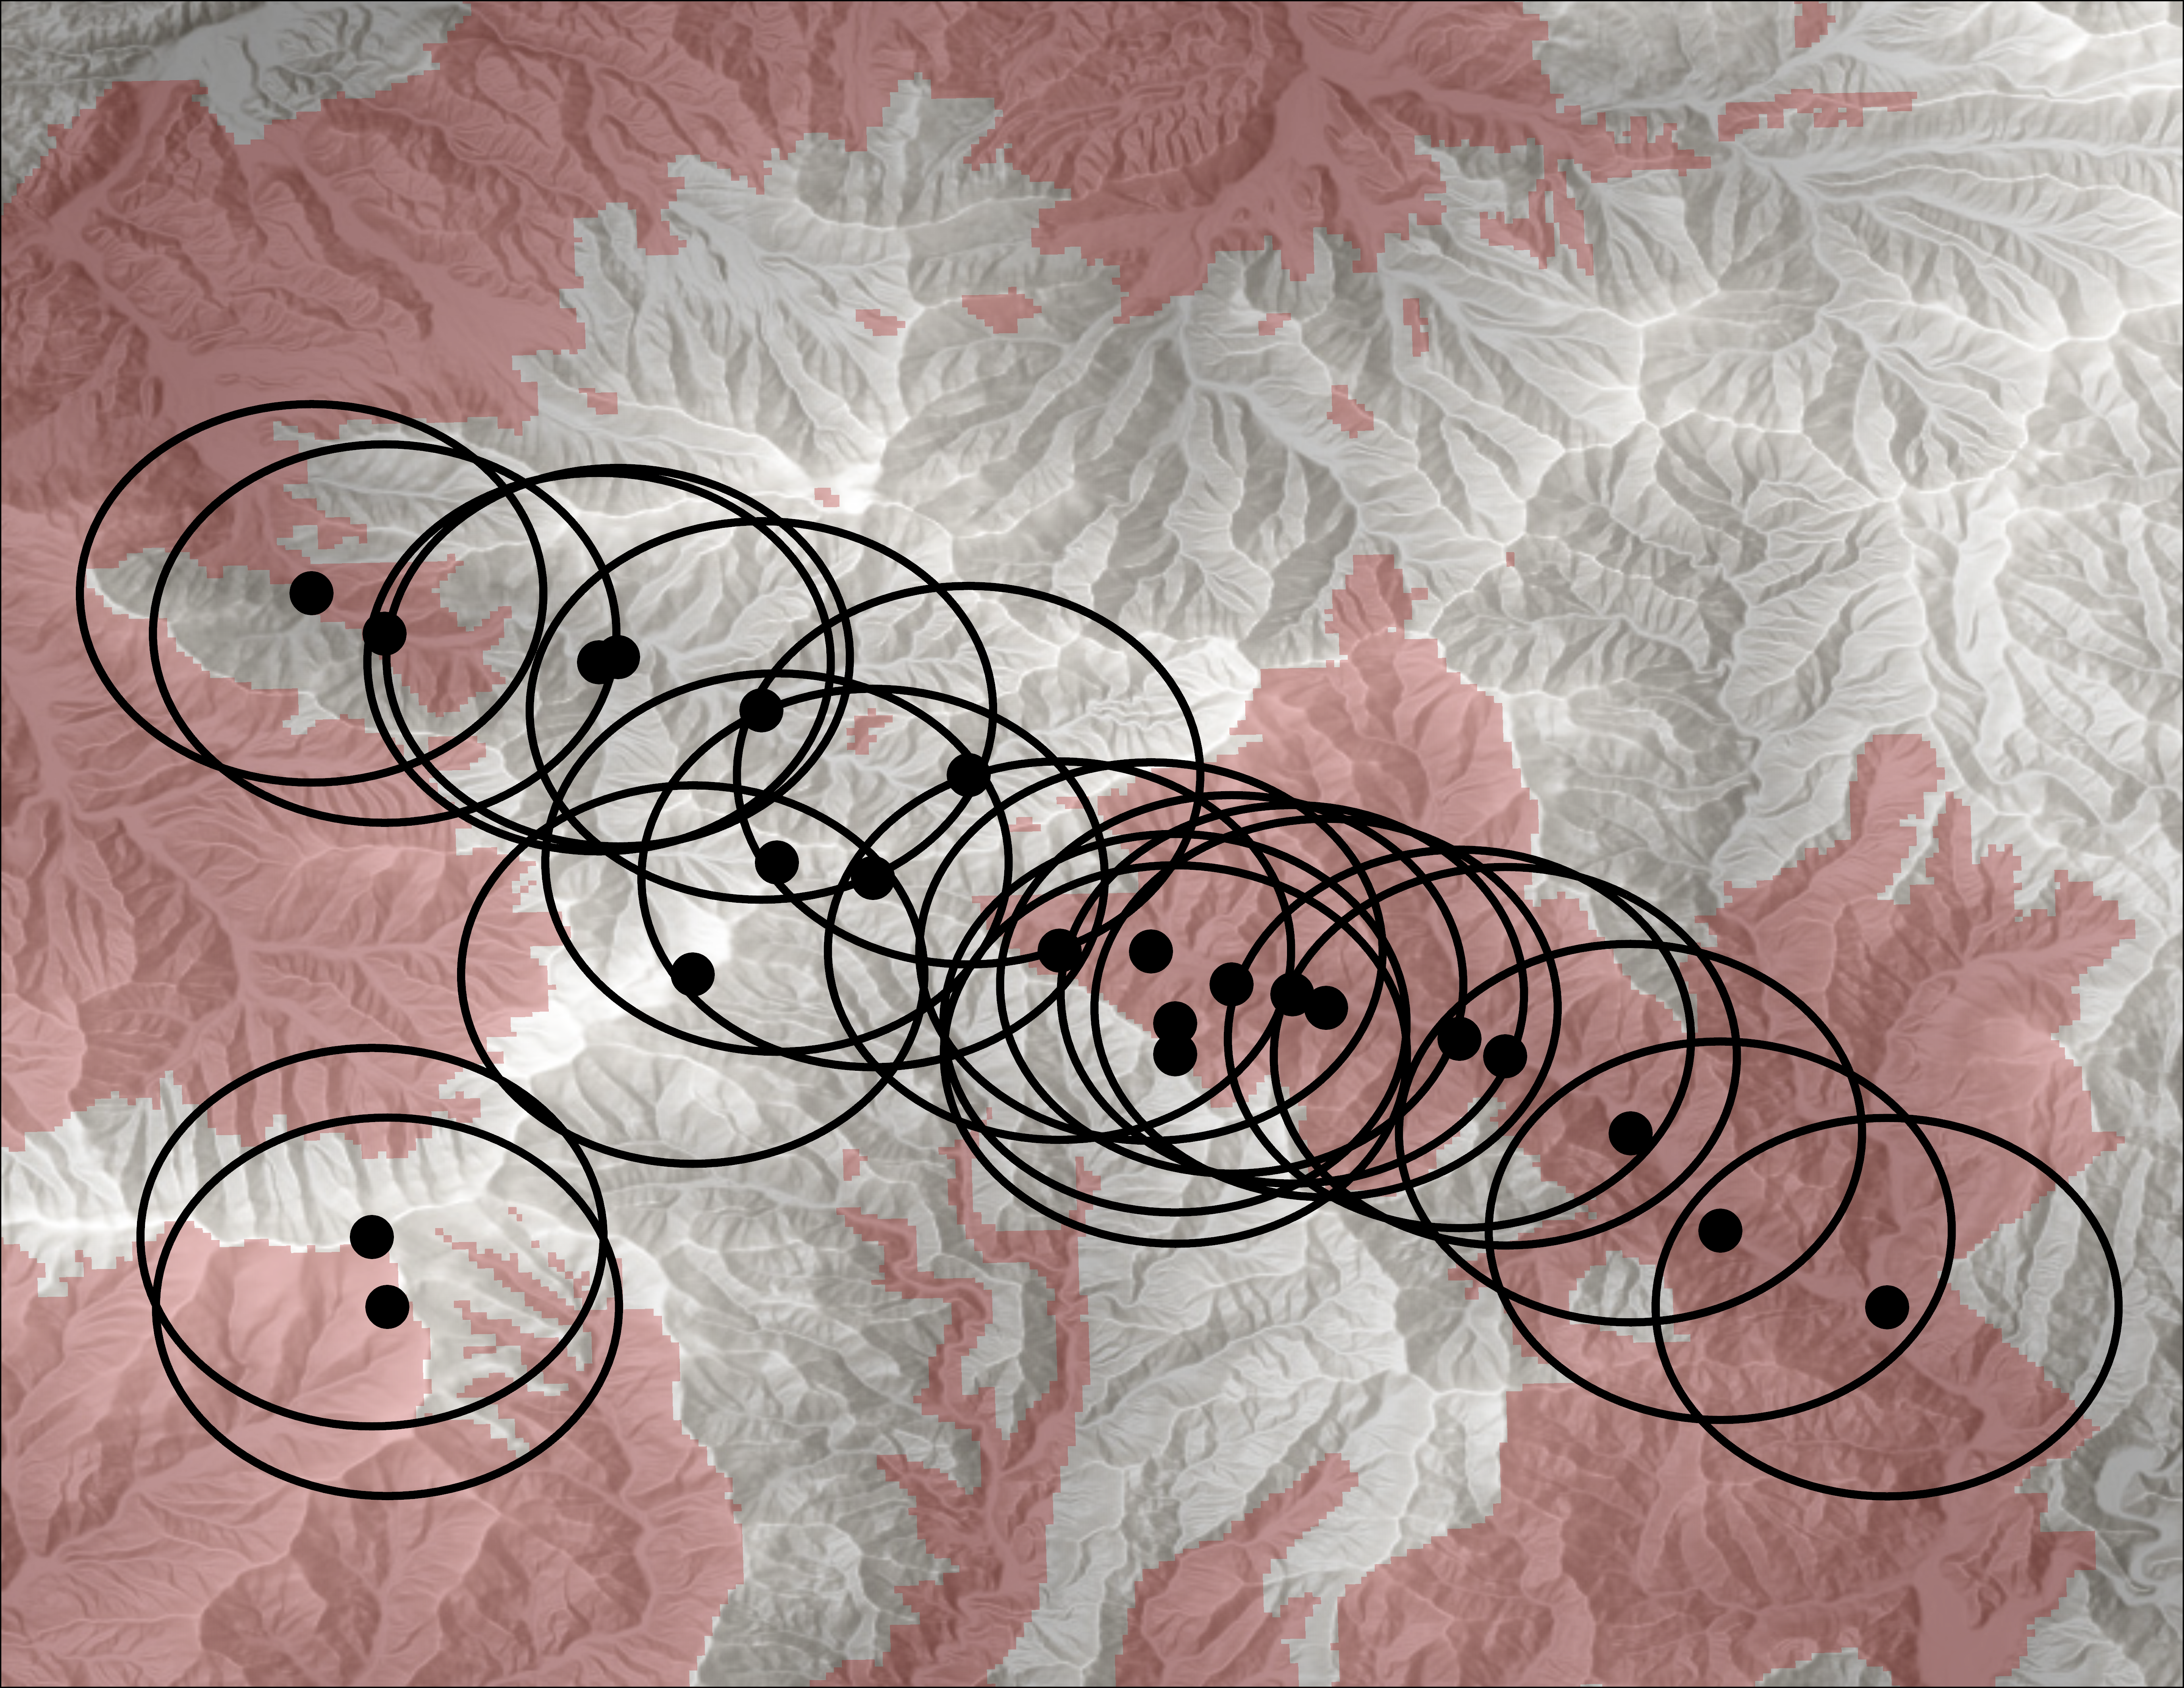


Fig. S2. A map displaying each sampling site (black points) surrounded by a 2600 m buffer (black lines) overlaid on historic disturbance in the Great Smoky Mountains National Park (red areas)

Fig. S3. Conditional effects plot for disturbance on understory density within 2600 m buffers surrounding sampling sites
