# Supplementary material for: Legacy of historical disturbance shapes modern genetic diversity in a high-elevation salamander
Source: Research Square preprint supplement (doi:10.21203/rs.3.rs-7623606/v1), 2025-10-12
Supplement: Supplementary file 2 [file e8787a9ac00ca0f518716e37.docx]

**Multiplex PCR Reactions**

The 11 microsatellites were arranged into two multiplex reactions (Table S1). We performed multiplex PCRs in 8 µL reactions using the Qiagen Multiplex PCR Kit (Valencia, CA, USA). The thermocycler protocol was: 15 min at 95°C; 35 cycles of 30 s at 94°C, 135 s at 60°C, and 60 s at 72°C; and a final extension of 30 min at 60°C. Amplification products were sized on an ABI 3730 DNA Analyzer (Applied Biosystems) with a Liz 600 size standard at the University of Missouri DNA Core Facility. Alleles were scored using GENEMARKER v1.97 (Softgenetics, State College, PA, USA). Additional details about primers can be found in Spatola et al. (2013).

**Table S1**. Fluorescent label, multiplex pool, and concentration (µM) for the 11 microsatellite loci used in this study.

| **Locus** | **Label** | | **Multiplex** | **Concentration** |
| --- | --- | --- | --- | --- |
| PG-43M | FAM | 2 | | 0.05 |
| PG-RIH | FAM | 2 | | 0.05 |
| PLAL-190B | FAM | 1 | | 0.1 |
| PLAL-AOYX3 | FAM | 2 | | 0.05 |
| PLAL-909 | VIC | 1 | | 0.05 |
| PLAL-315 | NED | 1 | | 0.1 |
| PLAL-084 | VIC | 1 | | 0.1 |
| PG-NFT | PET | 2 | | 0.1 |
| PLAL-241 | NED | 2 | | 0.1 |
| PLAL-127 | VIC | 2 | | 0.05 |
| PLAL-542 | PET | 1 | | 0.1 |

**Literature**

Spatola, B. N., W. E. Peterman, N. T. Stephens, G. M. Connette, D. B. Shepard, K. H. Kozak, R. D. Semlitsch, and L. S. Eggert. 2013. Development of microsatellite loci for the western slimy salamander (*Plethodon albagula*) using 454 sequencing. Conservation Genetics Resources 5:267–270.
